# Supplementary material for: Changing effects of external forcing on Atlantic-Pacific interactions
Source: Copernicus journal article supplement (doi:10.5194/egusphere-2023-1861), 2023-10-04
Supplement: Supplementary file 1 [file egusphere-2023-1861-supplement.pdf]

# Changing effects of external forcing on Atlantic-Pacific interactions

Soufiane Karmouche<sup>1,2</sup>, Evgenia Galytska<sup>1,2</sup>, Gerald A. Meehl<sup>3</sup>, Jakob Runge<sup>4,5</sup>, Katja Weigel<sup>1,2</sup>, and Veronika Eyring<sup>2,1</sup>

<sup>1</sup>University of Bremen, Institute of Environmental Physics (IUP), Bremen, Germany

<sup>2</sup>Deutsches Zentrum für Luft- und Raumfahrt e.V. (DLR), Institut für Physik der Atmosphäre, Oberpfaffenhofen, Germany

<sup>3</sup>Climate and Global Dynamics Laboratory, National Center for Atmospheric Research (NCAR), Boulder, CO, USA

<sup>4</sup>Deutsches Zentrum für Luft- und Raumfahrt e.V. (DLR), Institut für Datenwissenschaften, Jena, Germany

<sup>5</sup>Fachgebiet Klimainformatik, Technische Universität Berlin, Berlin, Germany

**Correspondence:** Soufiane Karmouche (sou\_kar@uni-bremen.de)

## 1 Supplementary Material

**Table S1.** Directing unoriented contemporaneous links based on most detected direction within a specific run among the 10 simulations of the CESM2 pacemaker ensemble (Fig. 7).

| Unoriented Links         | Instances            | Direction                      | Ruling                                                   |
|--------------------------|----------------------|--------------------------------|----------------------------------------------------------|
| PNA—NAO                  | Fig. 5d              | <b>NAO→PNA</b>                 | Most detected direction for "1985-2014 minus MEM" regime |
| Niño3.4—PNA              | Fig. 5d              | <b>Niño3.4→PNA</b>             | Based on the 1-season lagged instances in all regimes    |
| Niño3.4—PWC <sub>u</sub> | P1 and P2 in Fig. 8b | <b>PWC<sub>u</sub>→Niño3.4</b> | Most detected direction in all regimes                   |

### Atlantic-driven period (1986-2014)

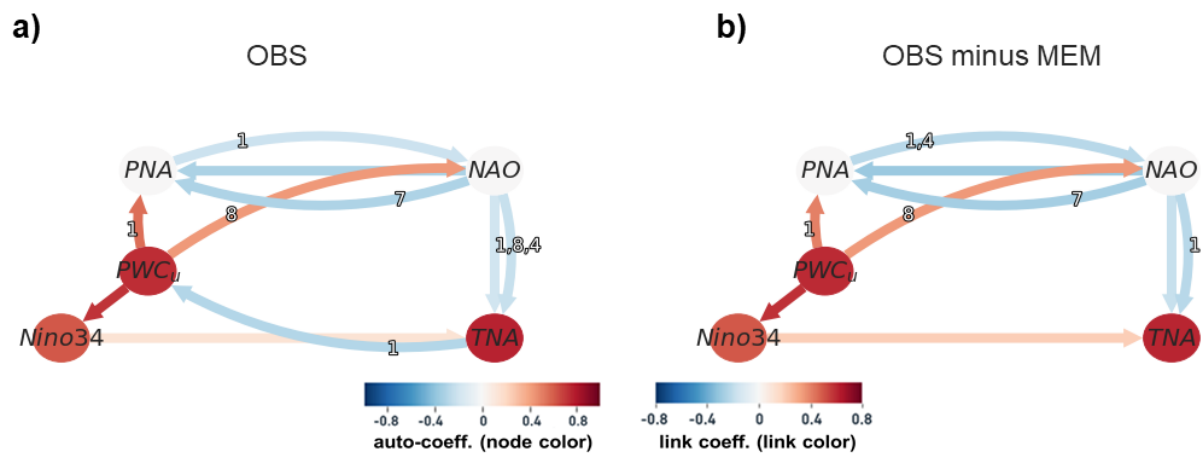

Figure S1. Atlantic-driven regime starting in 1986 (instead of 1985) shows vanishing TNA → PWC<sub>u</sub> link when MEM is subtracted.  
 a) Similar to Fig. 5b but for 1986-2014. b) Similar to Fig. 5d but for 1986-2014 period
